# Supplementary figures and images for: Genetic Variance Estimation over Time in Broiler Breeding Programmes for Growth and Reproductive Traits
Source: MDPI journal article supplement (doi:10.3390/ani13213306), 2023-10-24

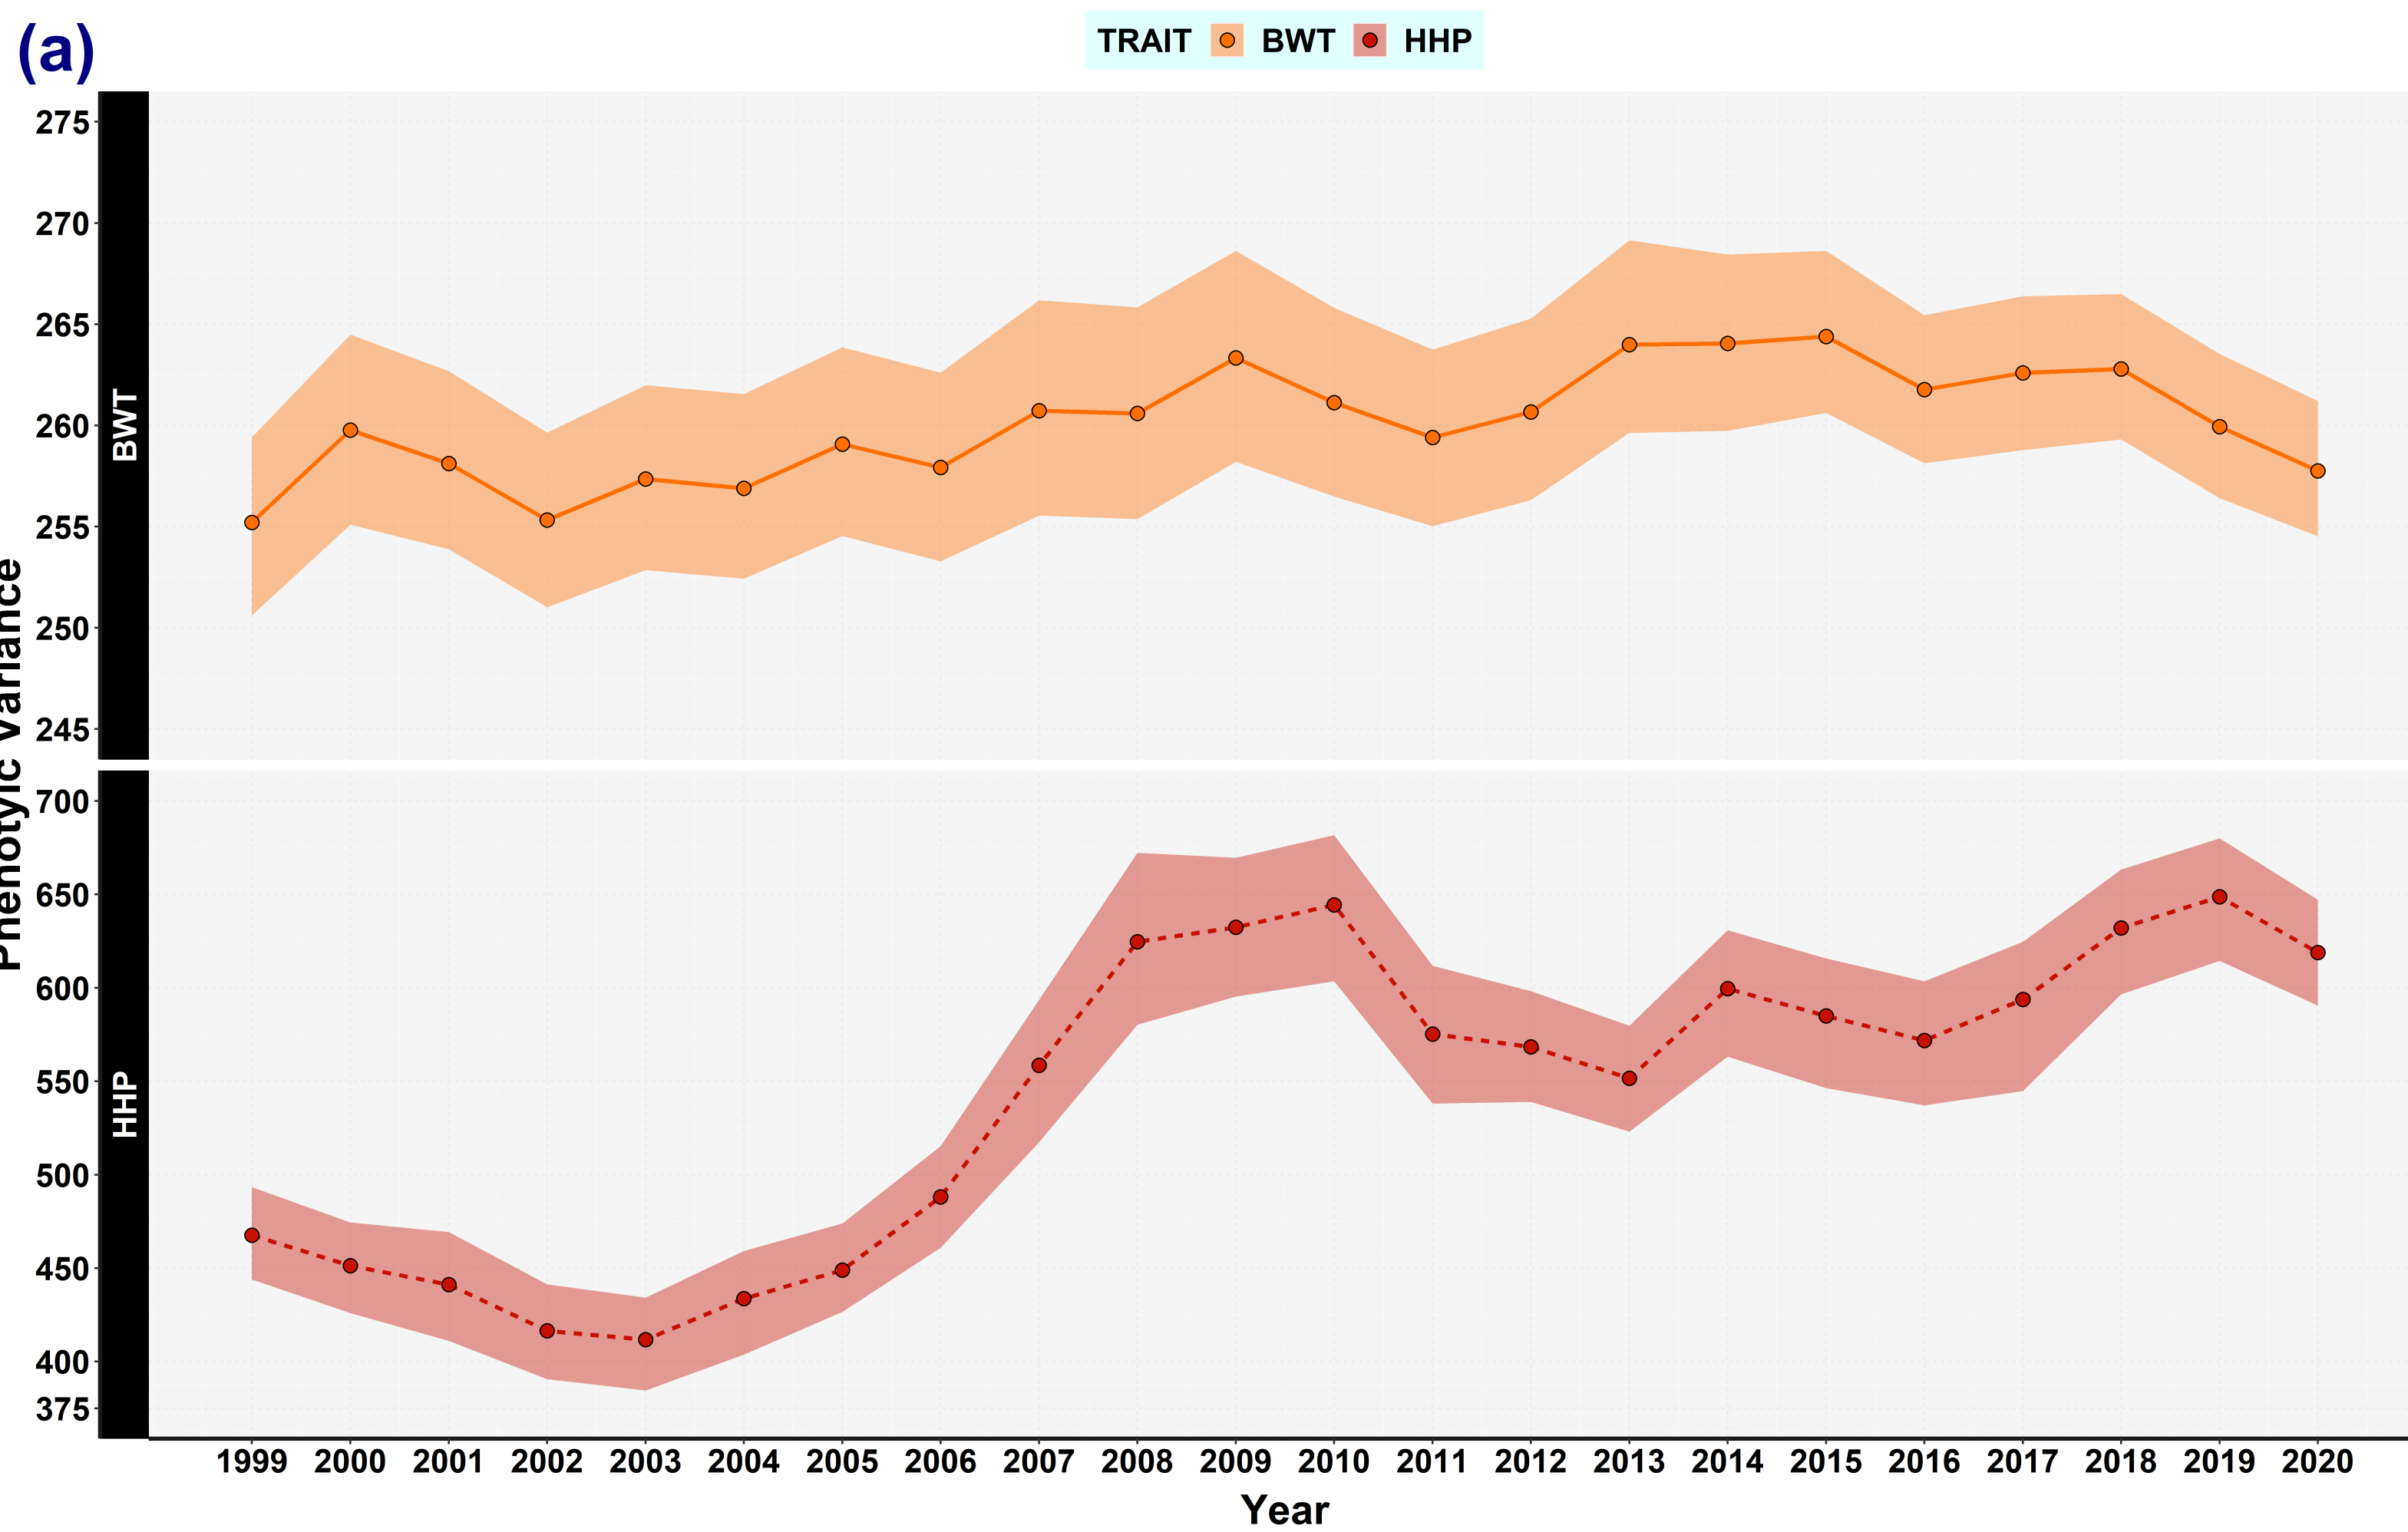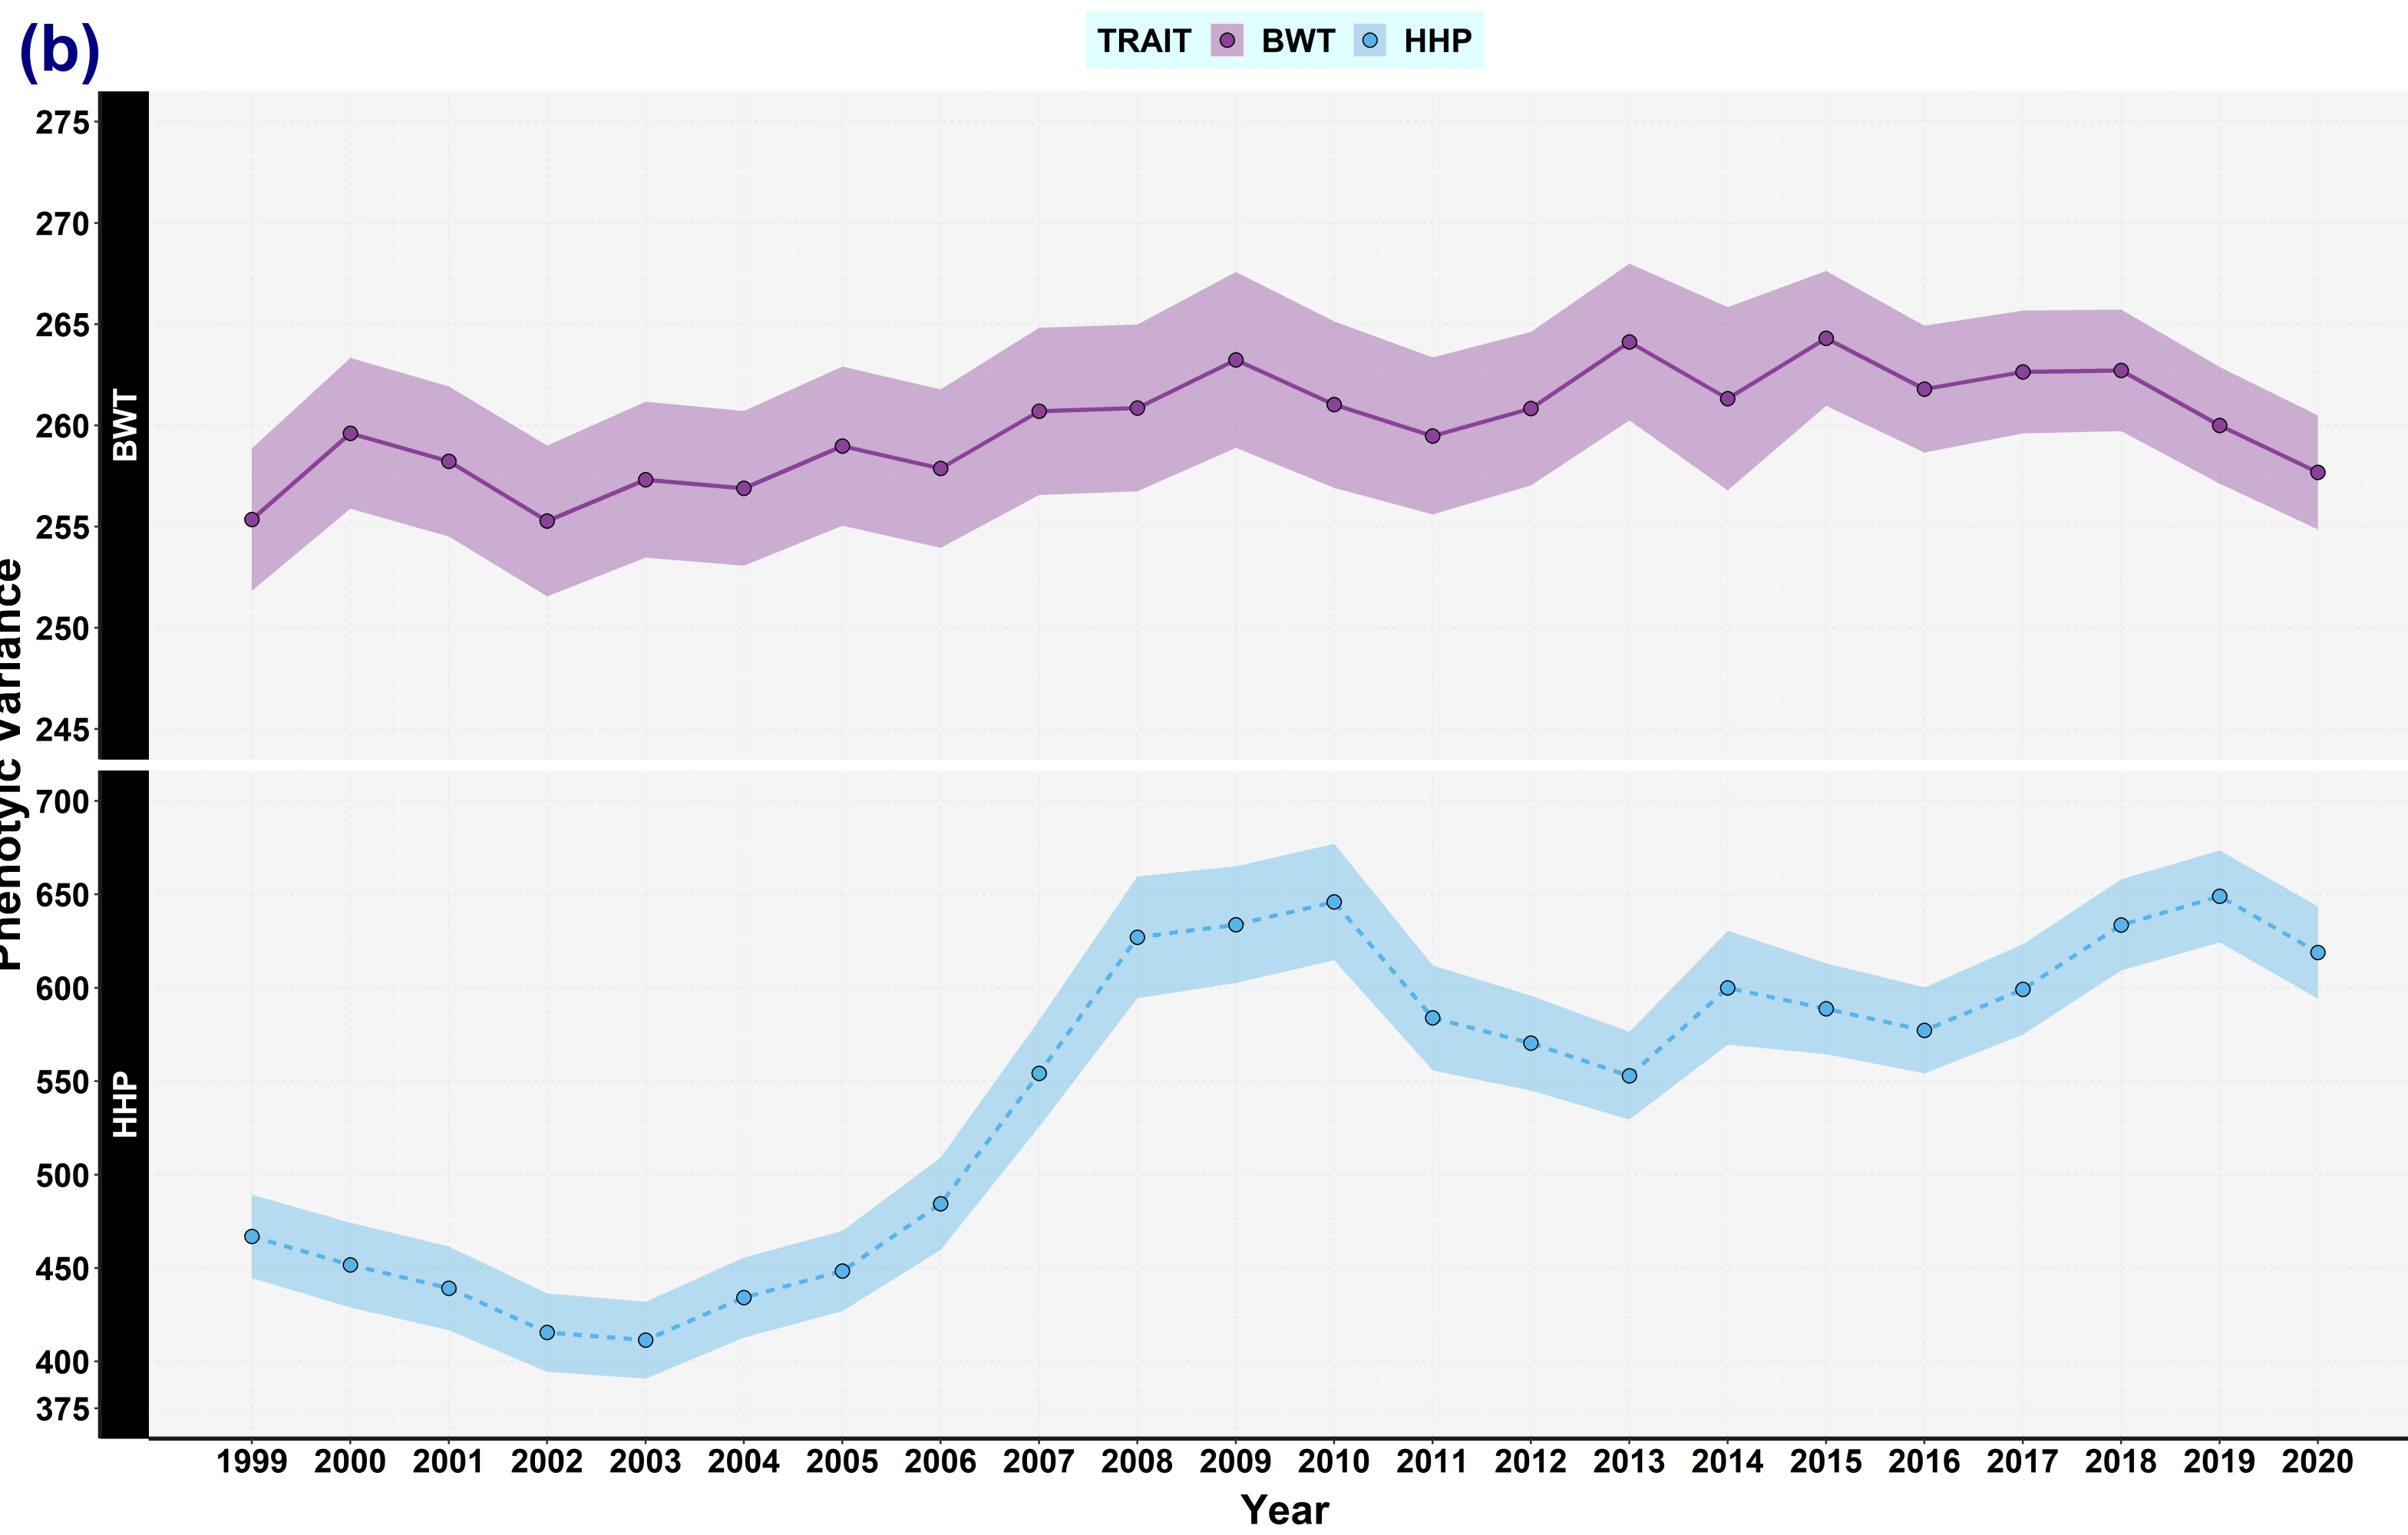

Supplement: s1 [file s1]

**(a)**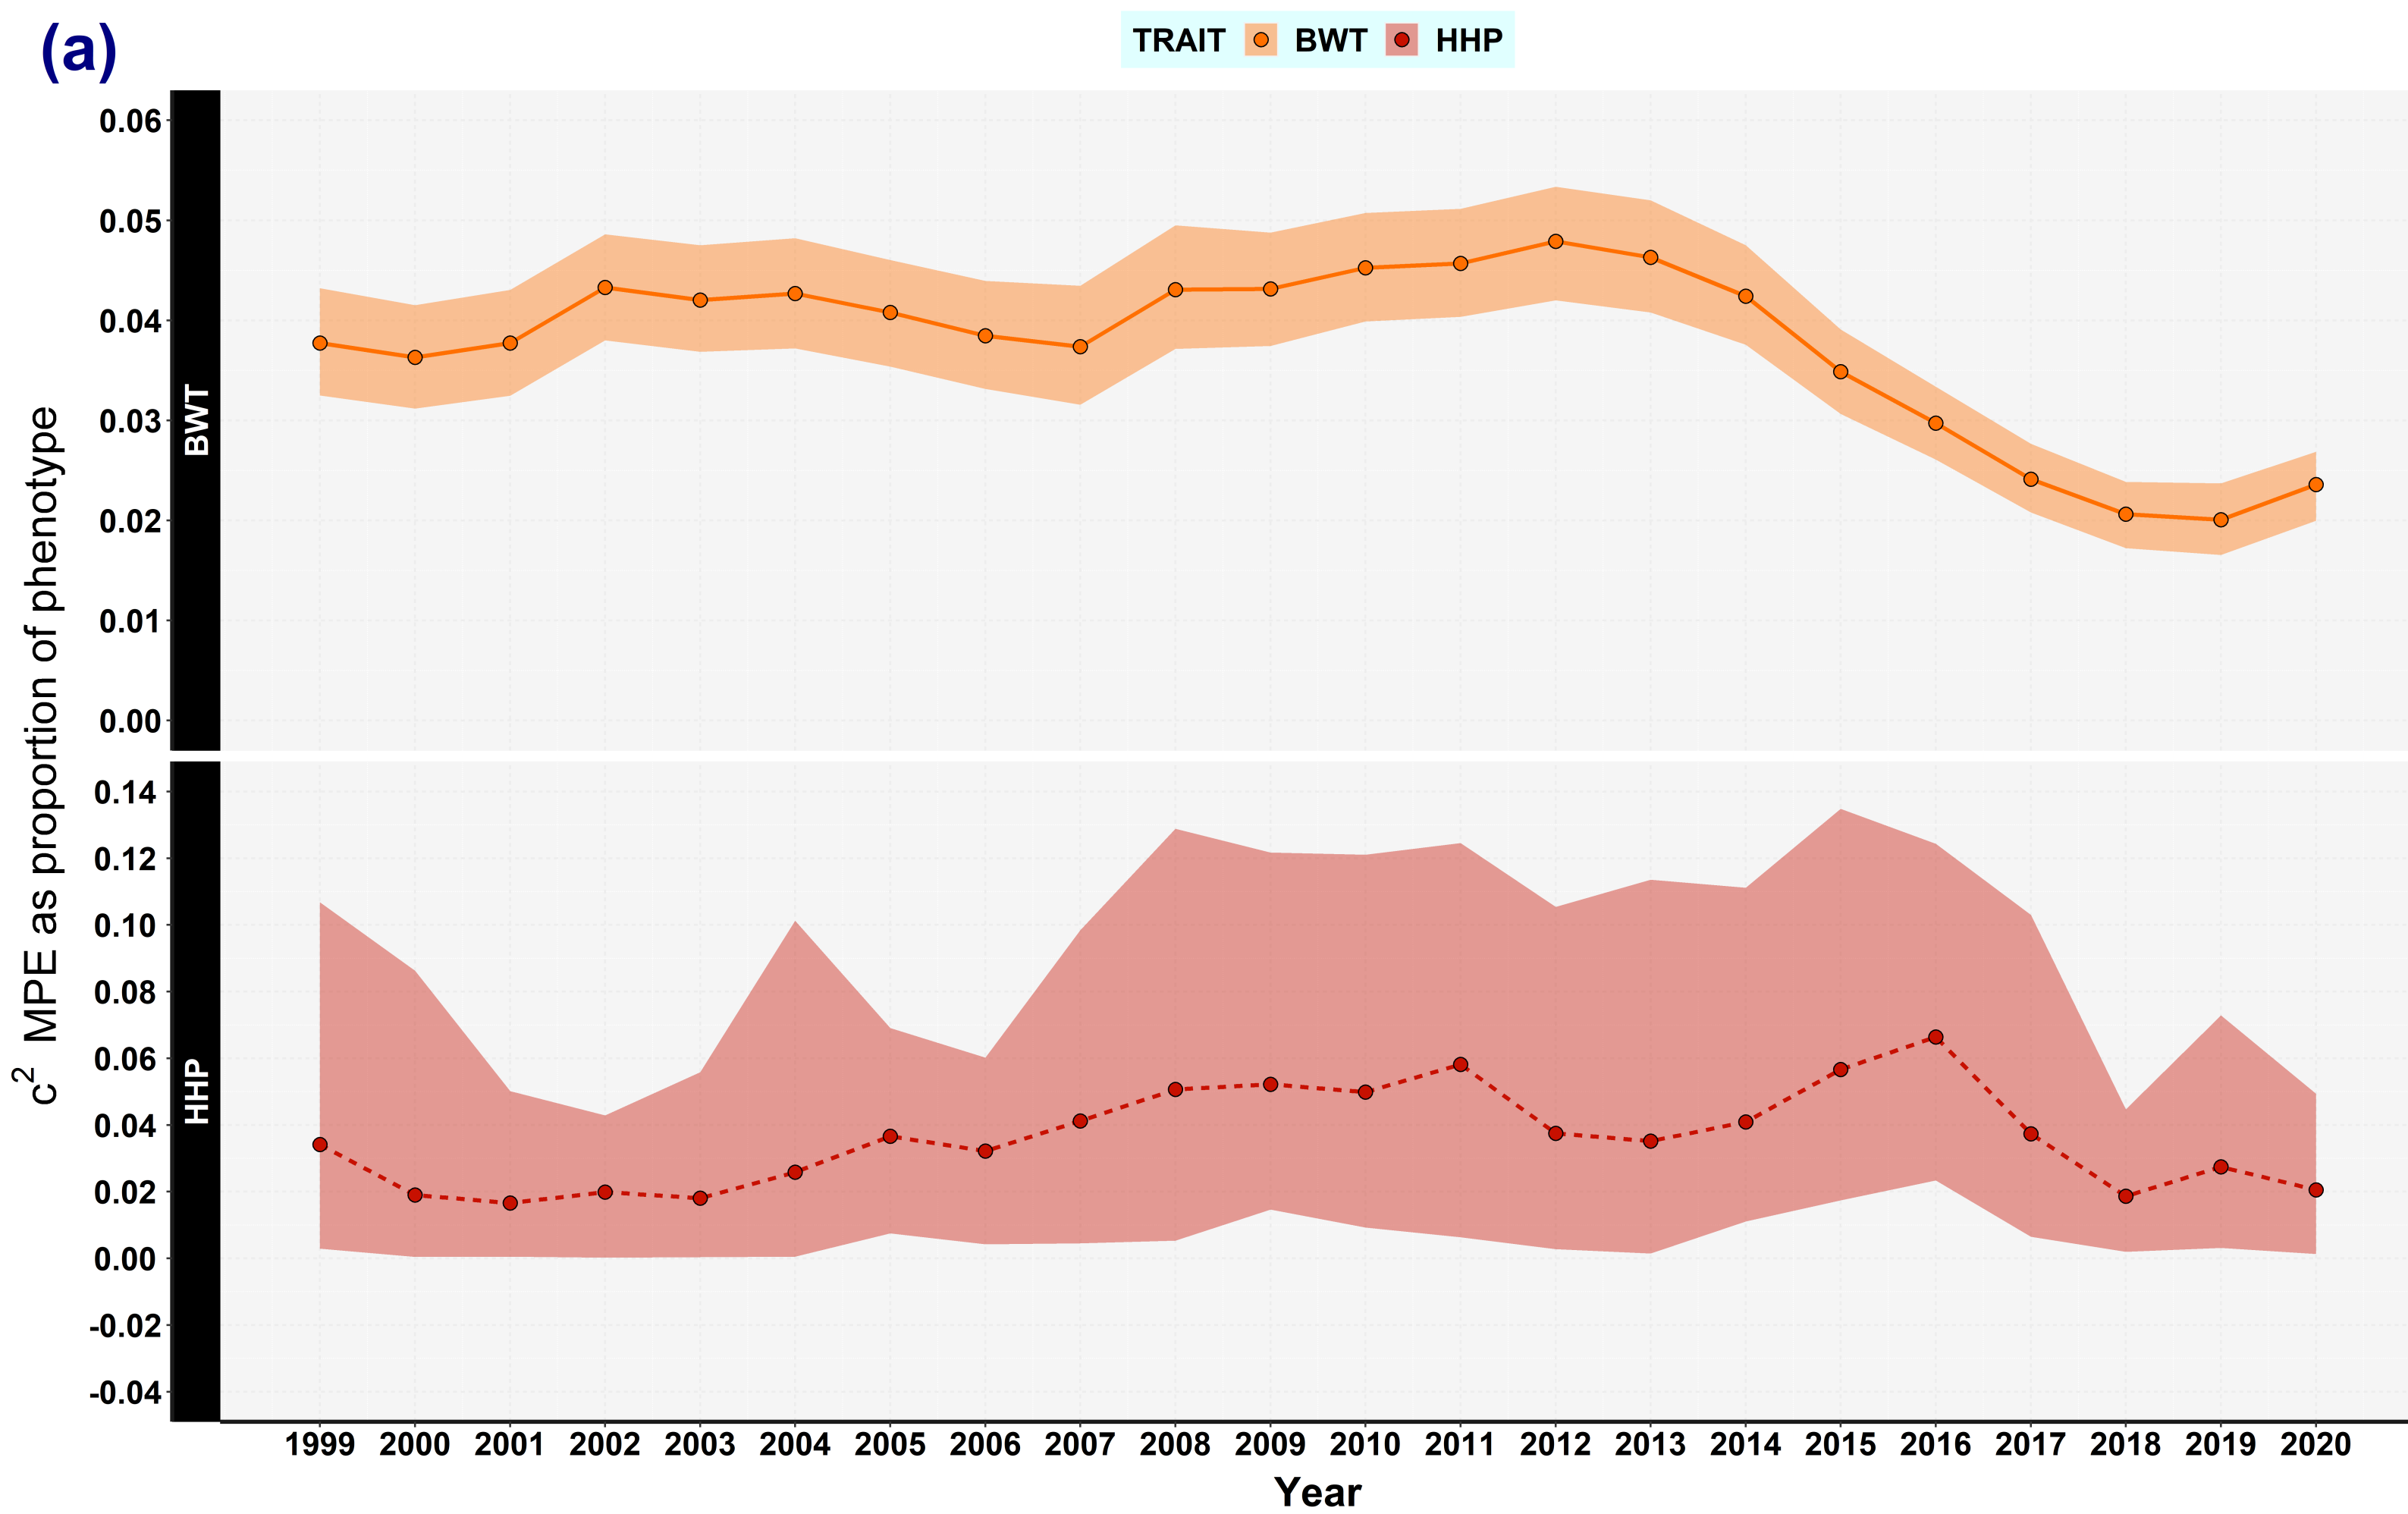**(b)**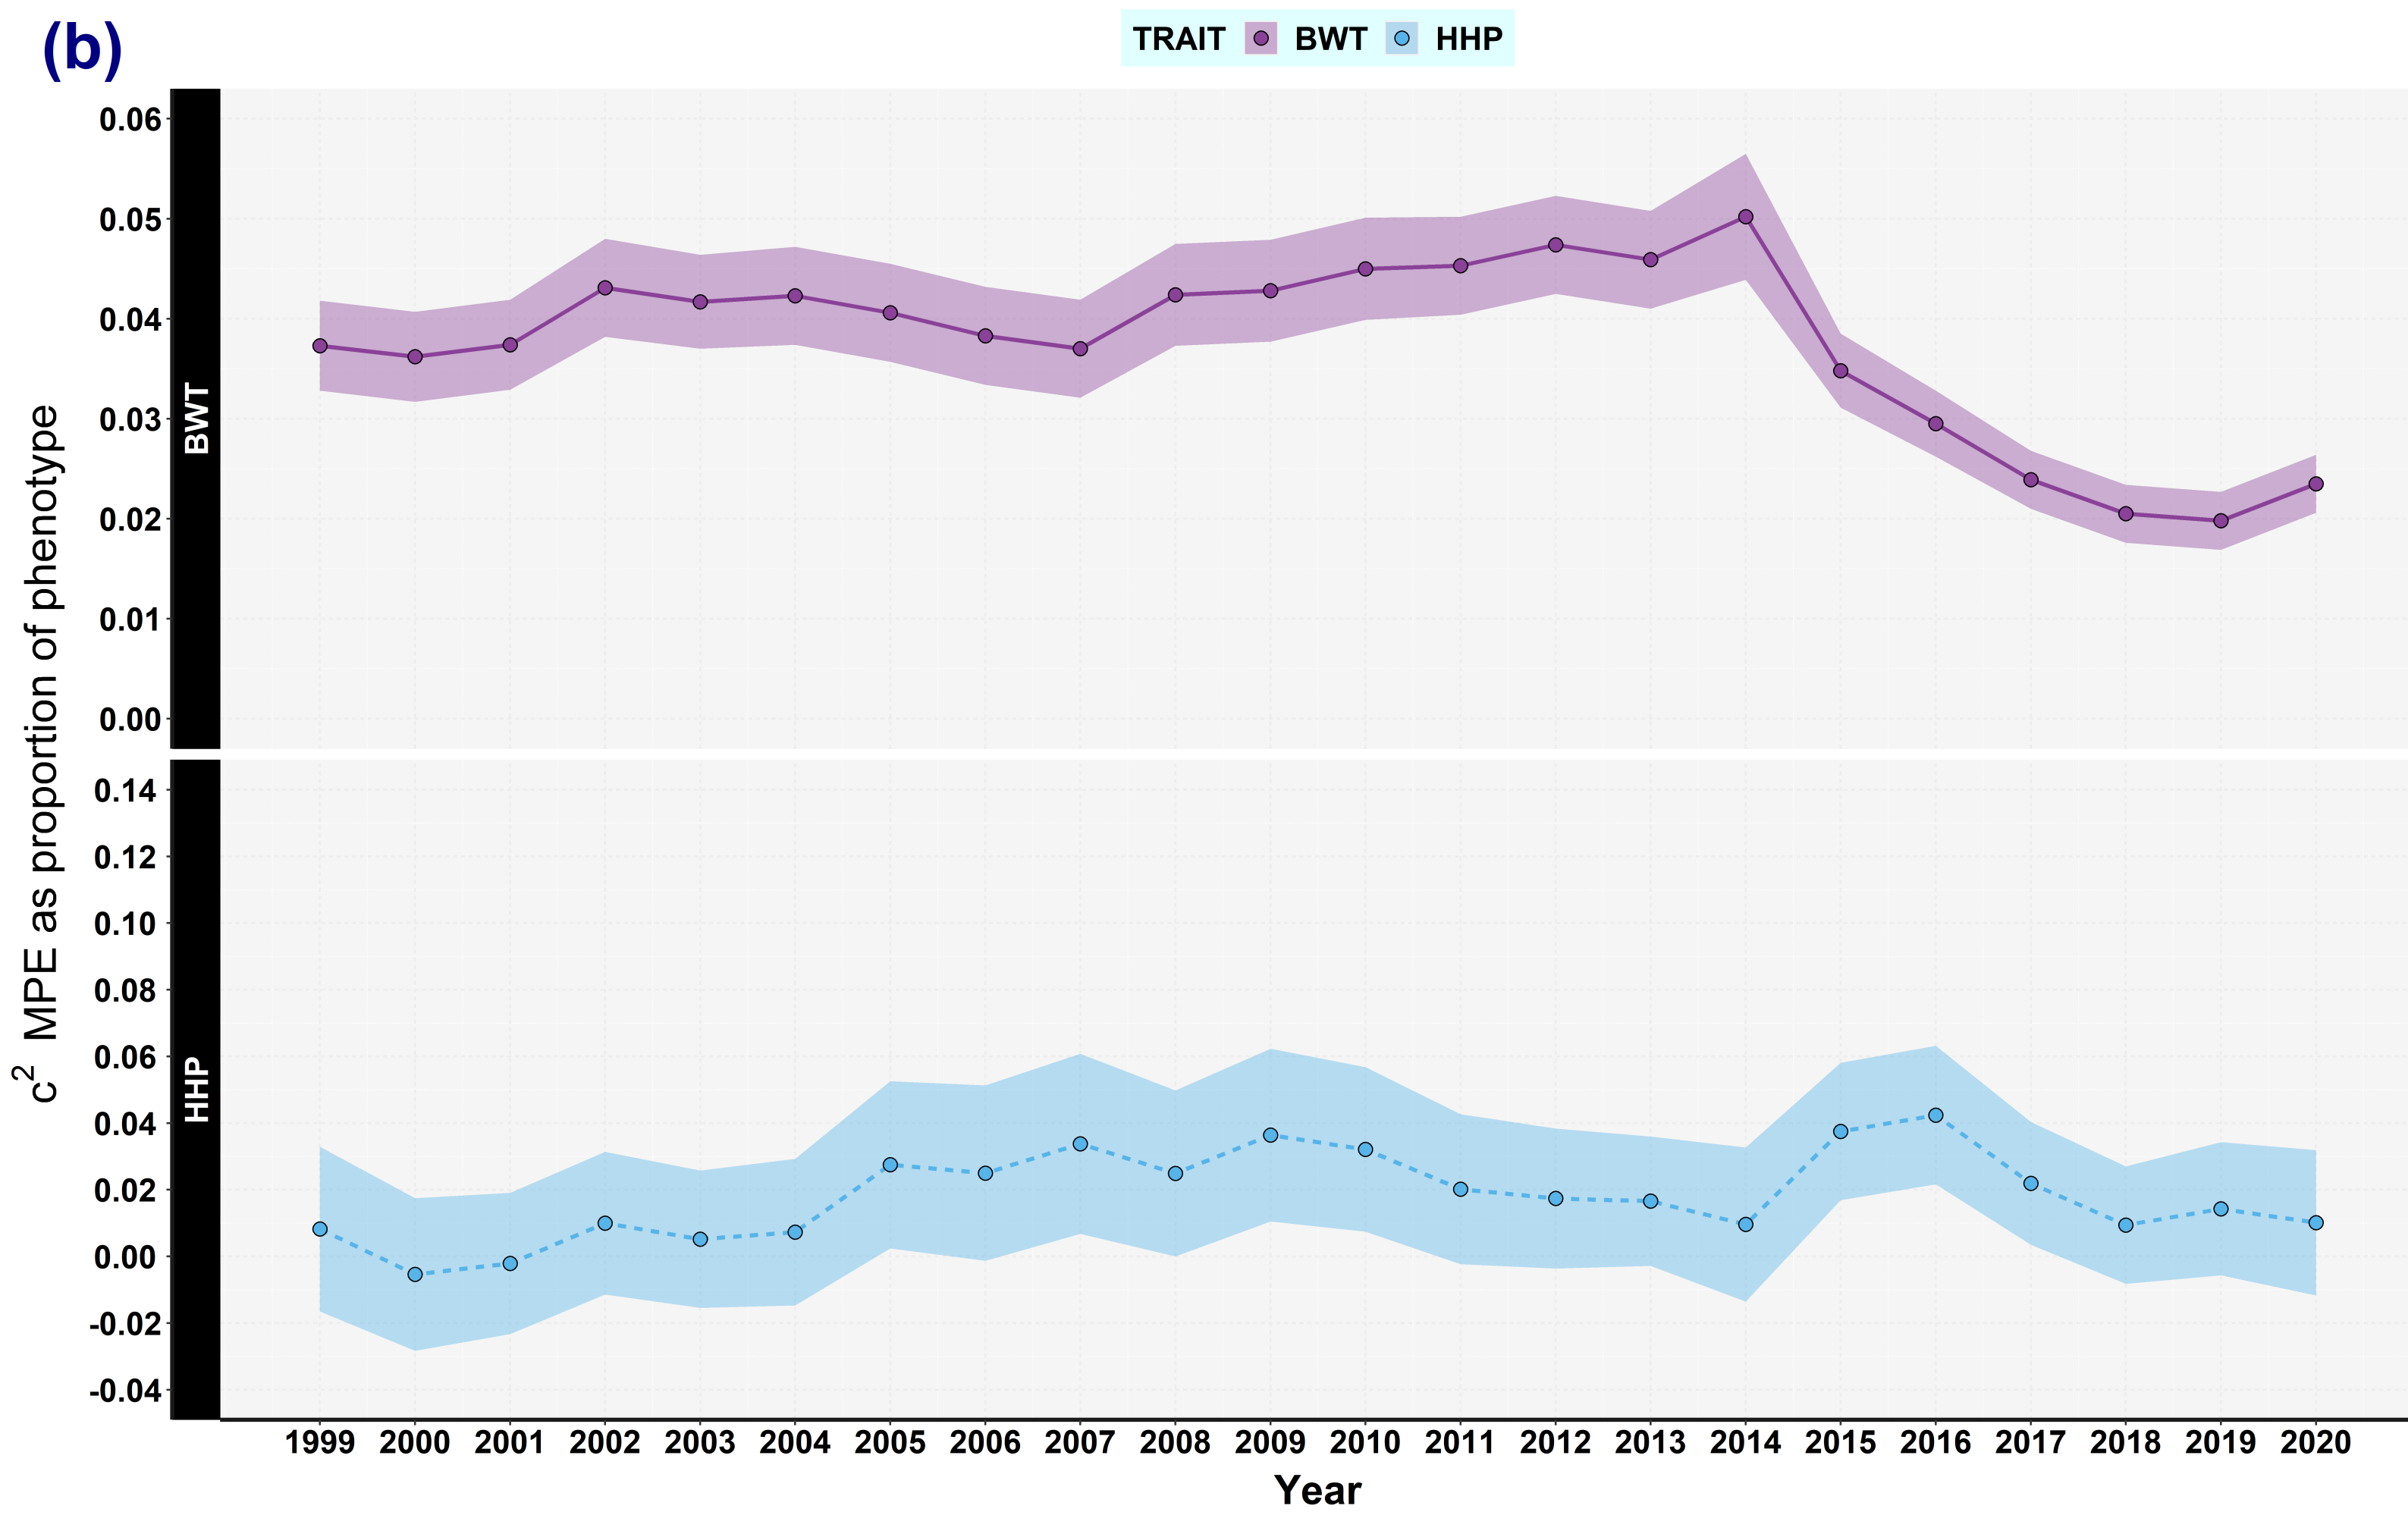

Supplement: s1 [file s1]

TRAIT   BWT   BWT-HHP   HHP

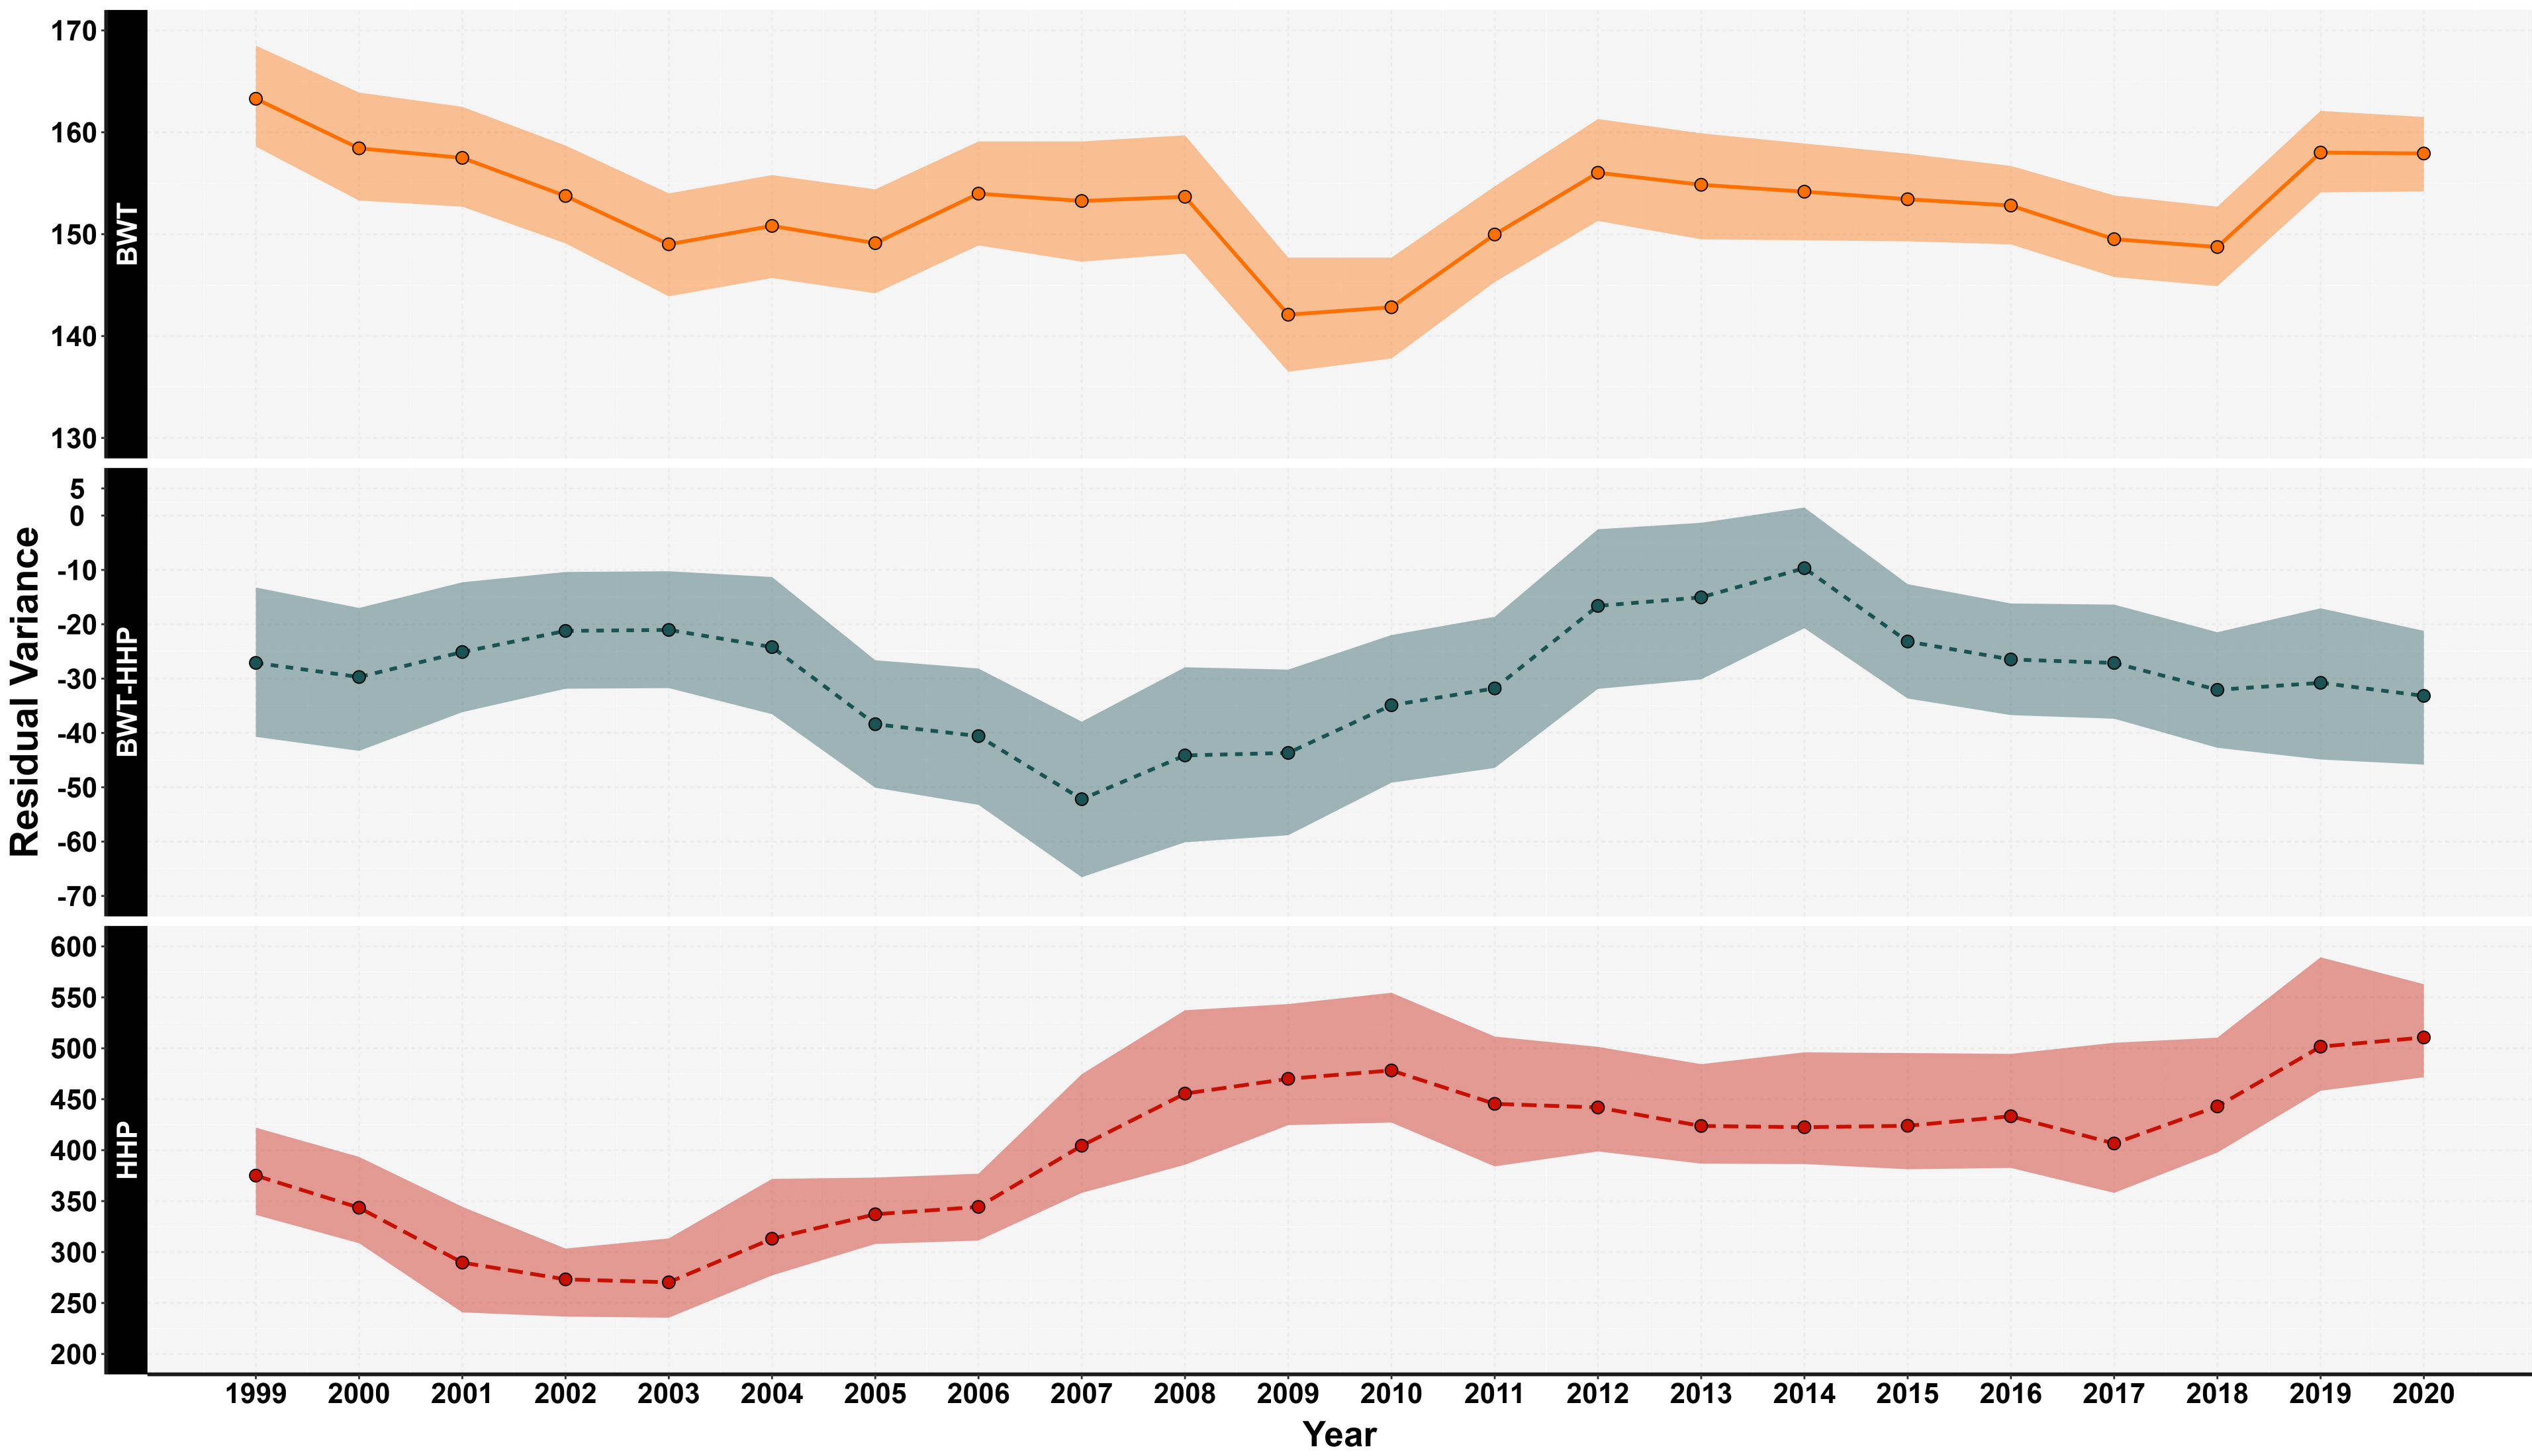

Supplement: s1 [file s1]

(a)

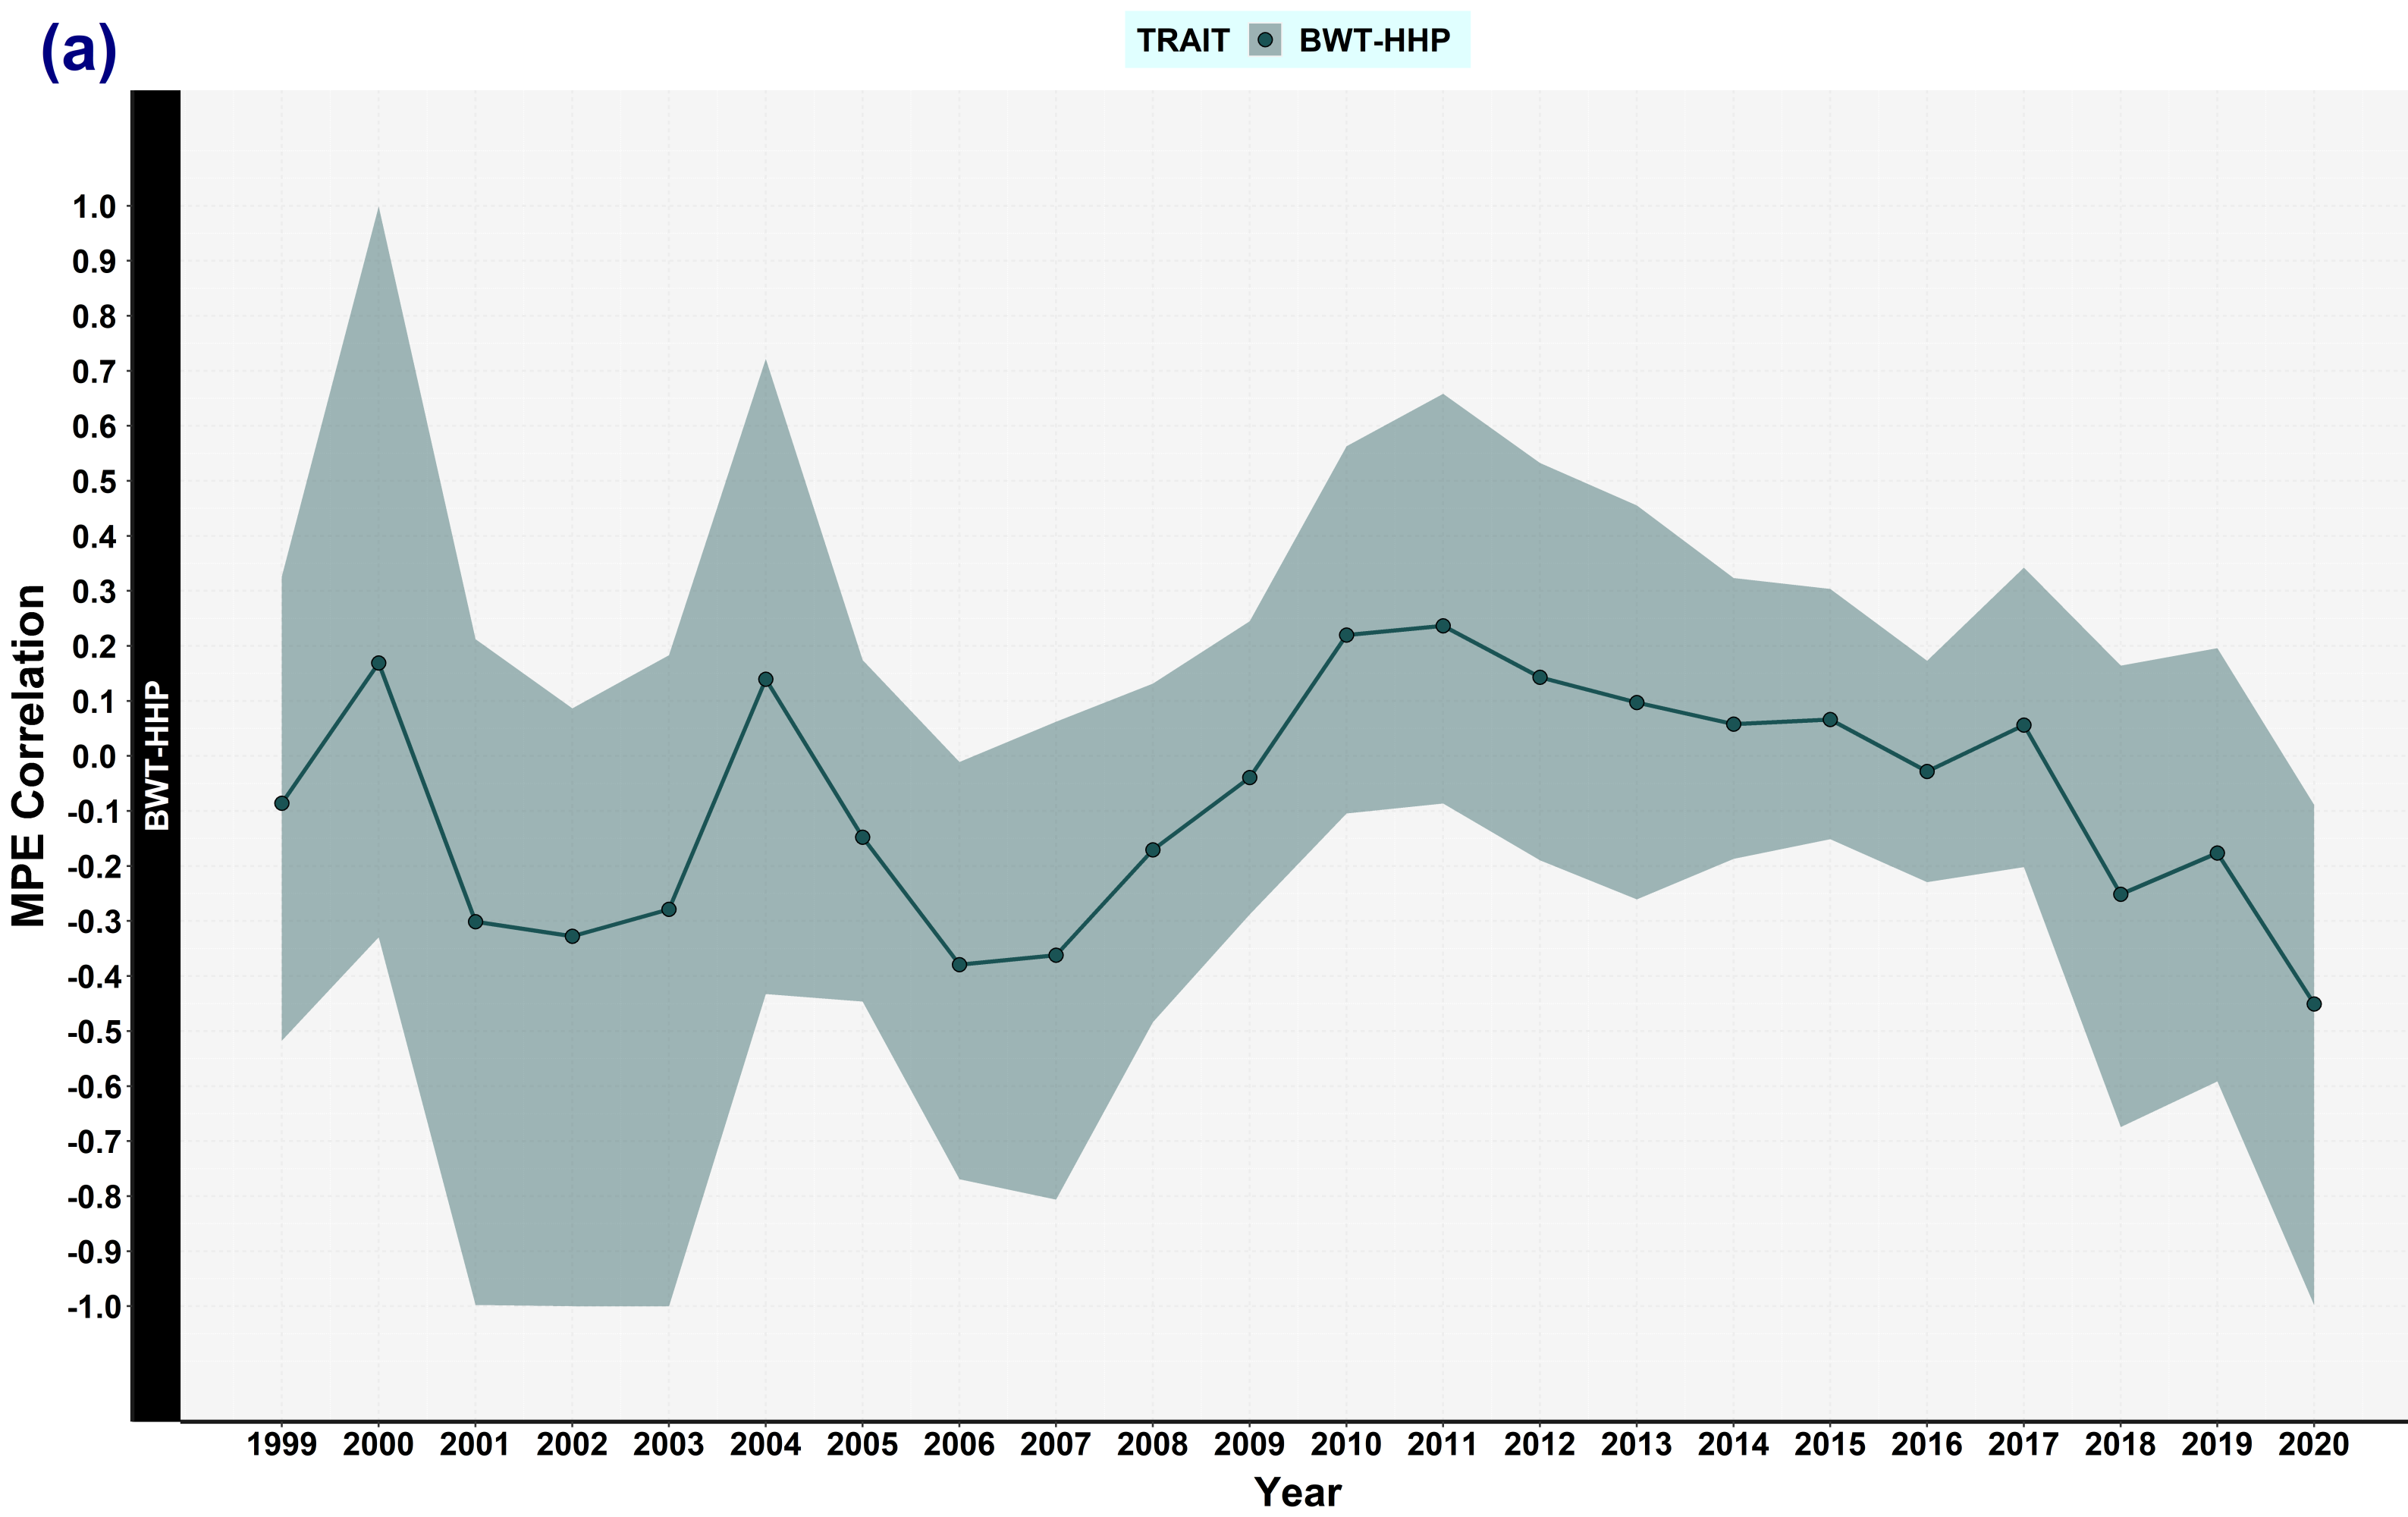

(b)

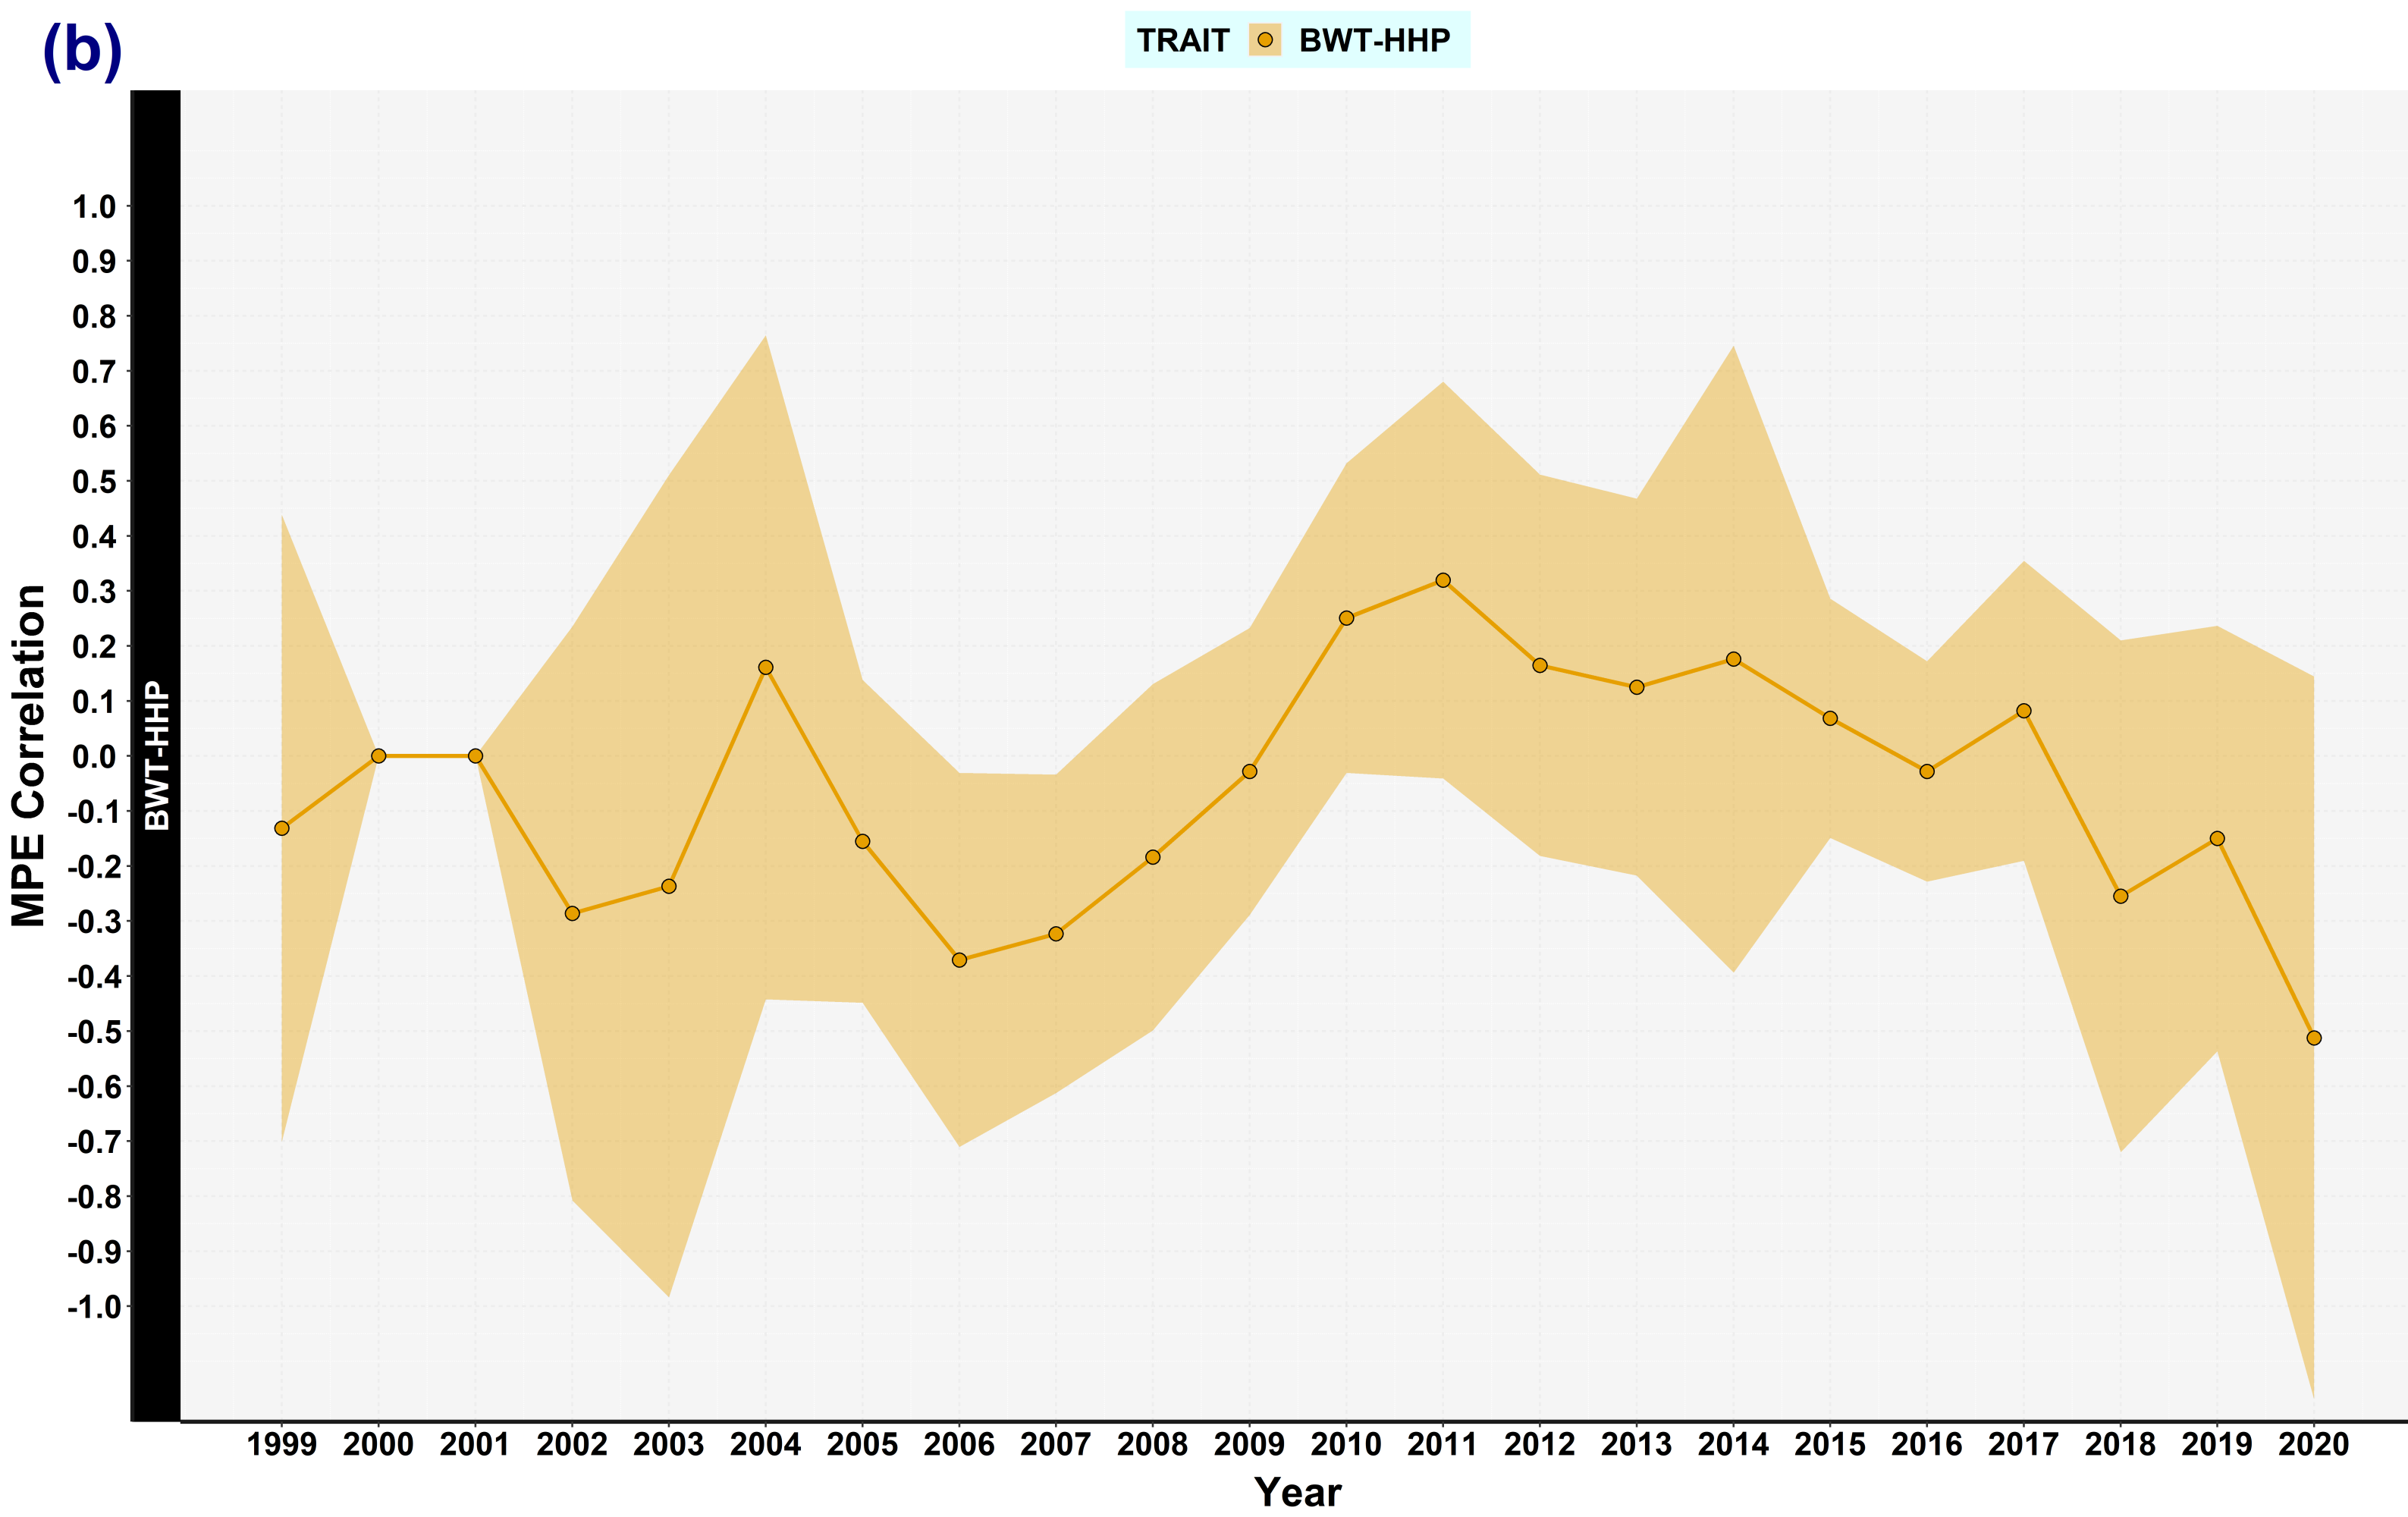

Supplement: s1 [file s1]
